# Supplementary material
Source: Springer Nature journal article supplement (https://www.springermedizin.de/resource/supplementary/12913_2014_3527_MOESM2_ESM.pdf/9533088)

**PROSTATECTOMY**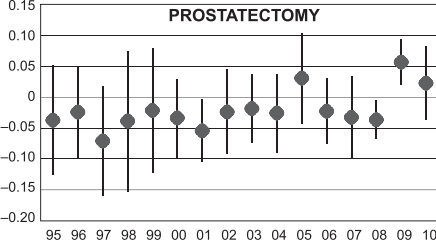**HYSTERECTOMY**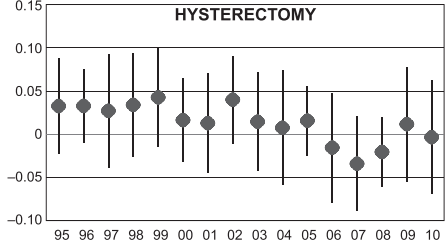**LOWER LIMB AMPUTATION**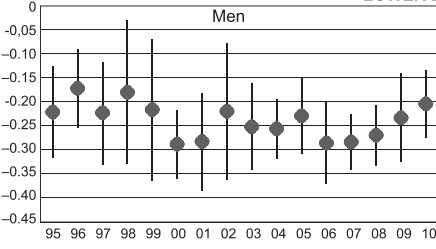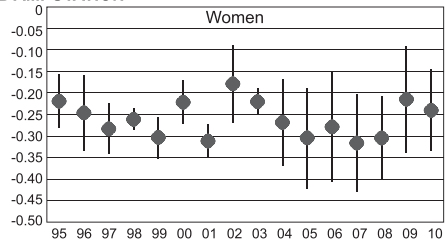**PRIMARY HIP REPLACEMENT**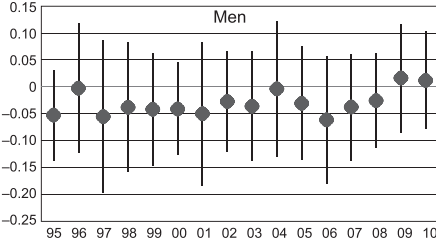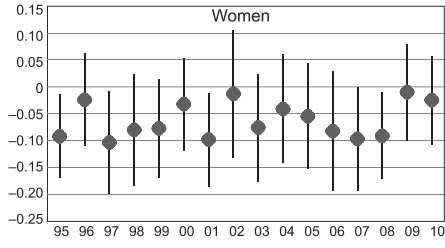**PRIMARY KNEE REPLACEMENT**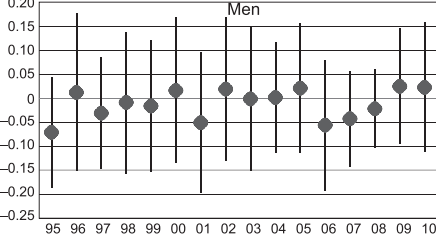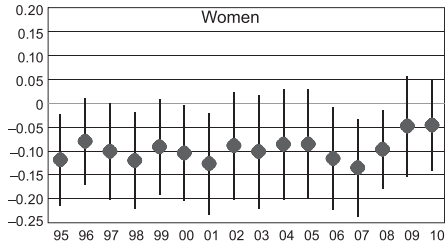**REVASCULARISATION**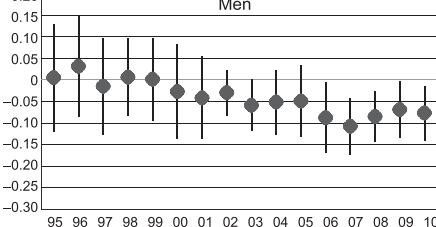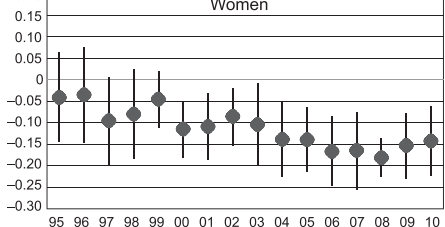

Supplement: MOESM2 [file 9533088]
